# Supplementary material for: Integrated NMR and MS Analysis of the Plasma Metabolome Reveals Major Changes in One-Carbon, Lipid, and Amino Acid Metabolism in Severe and Fatal Cases of COVID-19
Source: MDPI journal article supplement (doi:10.3390/metabo13070879), 2023-07-24
Supplement: s1 [file s1]

## Supplementary Material

# Integrated NMR and MS Analysis of the Plasma Metabolome Reveals Major Changes in One-Carbon, Lipid, and Amino Acid Metabolism in Severe and Fatal Cases of COVID-19

Marcos C. Gama-Almeida <sup>1,†</sup>, Gabriela D. A. Pinto <sup>1,†</sup>, Livia Teixeira <sup>2</sup>, Eugenio D. Hottz <sup>3</sup>, Paula Ivens <sup>4</sup>, Hygor Ribeiro <sup>4,5</sup>, Rafael Garrett <sup>4</sup>, Alexandre G. Torres <sup>1,5</sup>, Talita I. A. Carneiro <sup>1</sup>, Bianca de O. Barbalho <sup>1</sup>, Christian Ludwig <sup>6</sup>, Claudio J. Struchiner <sup>7,8</sup>, Iranaia Assunção-Miranda <sup>9</sup>, Ana Paula C. Valente <sup>10</sup>, Fernando A. Bozza <sup>11,12</sup>, Patrícia T. Bozza <sup>2</sup>, Gilson C. dos Santos, Jr. <sup>13,\*</sup> and Tatiana El-Bacha <sup>1,5,\*</sup>

- <sup>1</sup> LeBioME-Bioactives, Mitochondrial and Placental Metabolism Core, Institute of Nutrition Josué de Castro, Universidade Federal do Rio de Janeiro, Rio de Janeiro 21941-902, Brazil; marcosalmeidaj@gmail.com (M.C.G.-A.); gabidap@gmail.com (G.D.A.P.); torres@iq.ufrj.br (A.G.T.); talita.tiac@gmail.com (T.I.A.C.); biancabarbalho@ufrj.br (B.d.O.B.)
  - <sup>2</sup> Laboratory of Immunopharmacology, Oswaldo Cruz Institute, Oswaldo Cruz Foundation, Rio de Janeiro 21041-361, Brazil; liviaimunofar@gmail.com (L.T.); pbozza@ioc.fiocruz.br (P.T.B.)
  - <sup>3</sup> Laboratory of Immunothrombosis, Department of Biochemistry, Federal University of Juiz de Fora, Juiz de Fora 36936-900, Brazil; eugenio.hottz@icb.ufjf.br
  - <sup>4</sup> LabMeta, Metabolomics Laboratory, Institute of Chemistry, Universidade Federal do Rio de Janeiro, Rio de Janeiro 21941-598, Brazil; ivenspaula@gmail.com (P.I.); ribeirohygor@ufrj.br (H.R.); rafael\_garrett@iq.ufrj.br (R.G.)
  - <sup>5</sup> Lipid Biochemistry and Lipidomics Laboratory, Department of Chemistry, Universidade Federal do Rio de Janeiro, Rio de Janeiro 21941-598, Brazil
  - <sup>6</sup> Institute of Metabolism and Systems Research, University of Birmingham, Birmingham B15 2SQ, UK; c.ludwig@bham.ac.uk
  - <sup>7</sup> School of Applied Mathematics, Fundação Getúlio Vargas, Rio de Janeiro 22231-080, Brazil; claudio.struchiner@fgv.br
  - <sup>8</sup> Institute of Social Medicine, Universidade do Estado do Rio de Janeiro, Rio de Janeiro 20550-013, Brazil
  - <sup>9</sup> LaRIV, Instituto de Microbiologia Paulo de Goes, Universidade Federal do Rio de Janeiro, Rio de Janeiro 21941-902, Brazil; iranaiamiranda@micro.ufrj.br
  - <sup>10</sup> National Center for Nuclear Magnetic Resonance—Jiri Jonas, Institute of Medical Biochemistry, Universidade Federal do Rio de Janeiro, Rio de Janeiro 21941-902, Brazil; valente@cnrmn.bioqmed.ufrj.br
  - <sup>11</sup> National Institute of Infectious Disease Evandro Chagas, Oswaldo Cruz Foundation, Rio de Janeiro 21040-360, Brazil; fernando.bozza@ini.fiocruz.br
  - <sup>12</sup> D'Or Institute for Research and Education, Rio de Janeiro 22281-100, Brazil
  - <sup>13</sup> LabMet-Laboratory of Metabolomics, Instituto de Biologia Roberto Alcântara Gomes (IBRAG), Department of Genetics, State University of Rio de Janeiro, Rio de Janeiro 20551-030, Brazil
- \* Correspondence: gilson.junior@uerj.br (G.C.d.S.J.); tatiana@nutricao.ufrj.br (T.E.-B.)  
† These authors contributed equally to this work.

**Supplementary Table S1:** Assignment table of metabolites that discriminated in the PCA and univariate analyses

**Supplementary Table S2:** Assignment table of broad signals of compounds that discriminated in the PCA and univariate analysis

**Supplementary Table S3:** Parameters used for untargeted analysis in MS-DIAL software

**Supplementary Table S4:** List of the target compounds monitored in the method at pH 8

**Supplementary Table S5:** List of the target compounds monitored in the method at pH 3

**Supplementary Table S6:** Assigned metabolites with significant differences among groups according to the non-targeted MS-metabolomics in the negative mode.

**Supplementary Table S7:** Assigned metabolites according to the non-targeted MS-metabolomics in the positive mode.

**Supplementary Figure S1.** PCA loading factors plot highlights the discriminant metabolites for the separation of groups according to <sup>1</sup>H NMR-based metabolomics.

**Supplementary Figure S2.** PC1 scores plot versus sample in run order at pH 8 and pH 3 analyses indicating the stability of the system throughout the analytical run.

**Supplementary Figure S3:** Classification and Regression Tree (CART) model indicates that (CH<sub>3</sub>)<sub>3</sub>-choline related metabolites and creatine/creatinine present high predictive power in assigning subjects to their morbidity class.

**Supplementary Figure S4:** Classification and Regression Tree (CART) model indicates that (CH<sub>3</sub>)<sub>3</sub>-choline related metabolites and *N*-acetylserine present high predictive power in assigning subjects to their morbidity class.

**Supplementary Figure S5:** Classification and Regression Tree (CART) model indicates that hypoxanthine and *N*-acetylserine present high predictive power in assigning subjects to their morbidity class.

**Supplementary Figure S6:** Classification and Regression Tree (CART) model indicates that *N*-acetylserine presents high predictive power in assigning subjects to their morbidity class.

**Supplementary table S1:** Assignment table of metabolites that discriminated in the PCA and univariate analysis

The peak report of assigned compounds can be seen at <https://spin.ccic.osu.edu/index.php/colmarm>, session ID session ID 3121-pZ5ZukwXBh (COLMAR <https://spin.ccic.osu.edu/index.php/colmarm/index2>).

| Metabolite                              | Chemical Shift (ppm) |
|-----------------------------------------|----------------------|
| (CH <sub>3</sub> ) <sub>3</sub> choline | 3.19                 |
| Acetate                                 | 1.90                 |
| Acetoacetate                            | 2.22                 |
| Alanine                                 | 1.47                 |
| Arginine                                | 1.69                 |
| Creatine/Creatinine                     | 3.03                 |
| Formate                                 | 8.44                 |
| Glutamate+Glutamine                     | 2.15                 |
| Glutamine                               | 2.44                 |
| Glycine                                 | 3.55                 |
| Histidine                               | 7.11, 8.01           |
| Isoleucine                              | 0.94                 |
| Lactate                                 | 1.31                 |
| Leucine                                 | 0.95                 |
| Tyrosine                                | 6.87, 7.17           |
| Valine                                  | 0.98, 1.03           |

**Supplementary Table S2:** Assignment table of broad signals of compounds that discriminated in the PCA and univariate analysis

The peak report of assigned compounds can be seen at <https://spin.ccic.osu.edu/index.php/colmarm>, session ID session ID 3121-pZ5ZukwXBh (COLMAR <https://spin.ccic.osu.edu/index.php/colmarm/index2>).

| Lipids and proteins (broad signal)                      | Chemical Shift (ppm) |
|---------------------------------------------------------|----------------------|
| (CH <sub>3</sub> ) <sub>3</sub> choline-related signals | 3.19                 |
| CH <sub>3</sub> of lipoproteins                         | 1.24                 |
| CH <sub>2</sub> of lipoproteins                         | 0.85                 |
| CH=CH olefinic protons of triacylglycerols              | 5.28                 |
| N-acetyl of glycoproteins                               | 2.04                 |

**Supplementary Table S3:** Parameters used for untargeted analysis in MS-DIAL software.

| Parameters                                                               | pH8                                    | pH3                                    |
|--------------------------------------------------------------------------|----------------------------------------|----------------------------------------|
| MS1 tolerance                                                            | 0.005                                  | 0.005                                  |
| MS2 tolerance                                                            | 0.05                                   | 0.05                                   |
| minimum peak height                                                      | 5000,000                               | 5000,000                               |
| mass slice width                                                         | 0.05                                   | 0.1                                    |
| sigma window value for<br>deconvolution tolerances for peak<br>alignment | 0.5 - Liner weighted<br>moving average | 0.5 - Liner weighted<br>moving average |
| <i>Smoothing method</i>                                                  |                                        |                                        |
| Smoothing level                                                          | 3 scans                                | 3 scans                                |
| Minimum peak width                                                       | 5 scans                                | 5 scans                                |

**Supplementary Table S4:** List of the target compounds monitored in the method at pH 8.

| Nº | Compound name                                | Rt (min) | Adduct | Molecular formula | Precursor ion | Fragment ion 1 | Fragment ion 2 | Fragment ion 3 |
|----|----------------------------------------------|----------|--------|-------------------|---------------|----------------|----------------|----------------|
| 1  | Hypoxanthine                                 | 5.22     | [M-H]- | C5H4N4O           | 135.03124     | 92.02576       | -              | -              |
| 2  | D-Glucuronic acid                            | 7.23     | [M-H]- | C6H10O7           | 193.03538     | 113.02451      | 72.99319       | 103.00372      |
| 3  | Taurine                                      | 6.72     | [M-H]- | C2H7NO3S          | 124.00738     | 79.95819       | -              | -              |
| 4  | 2-Ketoglutaric acid                          | 7.13     | [M-H]- | C5H6O5            | 145.01425     | 101.02445      | 128.03522      | 83.05022       |
| 5  | <i>p</i> -Hydroxyphenyl lactic acid          | 5.83     | [M-H]- | C9H10O4           | 181.05063     | 163.04033      | 135.04541      | 119.05037      |
| 6  | Pyroglutamic acid                            | 6.74     | [M-H]- | C5H7NO3           | 128.03532     | 82.03000       | -              | -              |
| 7  | alpha-Hydroxy-isocaproic acid                | 4.57     | [M-H]- | C6H12O3           | 131.07137     | 85.06590       | 113.06087      | 69.03458       |
| 8  | D(+)-Glyceric acid                           | 6.78     | [M-H]- | C3H6O4            | 105.01933     | 72.99324       | 75.00884       | 59.01379       |
| 9  | Malonic acid                                 | 7.07     | [M-H]- | C3H4O4            | 103.00368     | 59.01285       | -              | -              |
| 10 | alpha-Lactose/D(+)-Maltose                   | 7.36     | [M-H]- | C12H22O11         | 341.10893     | 161.04465      | 101.02317      | 71.01254       |
| 11 | L-Isoleucine                                 | 6.44     | [M+H]+ | C6H13NO2          | 132.10189     | 86.09673       | 69.07040       | -              |
| 12 | L-Leucine                                    | 6.34     | [M+H]+ | C6H13NO2          | 132.10189     | 86.09673       | -              | -              |
| 13 | S-adenosylmethionine                         | 8.28     | [M+H]+ | C15H22N6O5S       | 399.14451     | -              | -              | -              |
| 14 | L-phenylalanine                              | 6.29     | [M+H]+ | C9H11NO2          | 166.08625     | 120.08086      | 131.04915      | 149.05968      |
| 15 | Lactic acid                                  | 6.26     | [M-H]- | C3H6O3            | 89.02442      | 71.01399       | -              | -              |
| 16 | Mannose/Galactose/Glucose                    | 6.80     | [M-H]- | C6H12O6           | 179.05611     | 59.01255       | 71.01252       | 89.02314       |
| 17 | 2-Methylbutyrylglycine                       | 5.75     | [M-H]- | C7H13NO3          | 158.08227     | 74.02499       | 114.09274      | -              |
| 18 | 3-Methyladipic acid                          | 7.06     | [M-H]- | C7H12O4           | 159.06628     | 115.07655      | 97.06592       | 141.05597      |
| 19 | 3-Methylglutaric/adipic acid                 | 7.15     | [M-H]- | C6H10O4           | 145.05063     | 101.06105      | 127.04047      | 83.05048       |
| 20 | beta-Hydroxybutyric acid                     | 6.20     | [M-H]- | C4H8O3            | 103.04007     | 59.01396       | 57.03466       | 85.02970       |
| 21 | Citric acid                                  | 7.54     | [M-H]- | C6H8O7            | 191.01973     | 111.00918      | 87.00906       | 129.01990      |
| 22 | Myristic acid                                | 1.29     | [M-H]- | C14H28O2          | 227.20166     | -              | -              | -              |
| 23 | Palmitic acid                                | 1.32     | [M-H]- | C16H32O2          | 255.23296     | -              | -              | -              |
| 24 | Uric acid                                    | 6.96     | [M-H]- | C5H4N4O3          | 167.02106     | 124.01566      | 152.01250      | -              |
| 25 | Choline                                      | 6.14     | [M]+   | C5H14NO           | 104.10699     | 60.08150       | -              | -              |
| 26 | Isobutyrylglycine                            | 6.02     | [M-H]- | C6H11NO3          | 144.06662     | 74.02489       | 100.07691      | -              |
| 27 | Proline                                      | 6.78     | [M+H]+ | C5H9NO2           | 116.07059     | 70.06561       | -              | -              |
| 28 | <b><i>p</i>-fluoro-DL-phenylalanine (IS)</b> | 6.10     | [M-H]- | C9H10FNO2         | 182.06228     | 165.03494      | 121.04539      | 72.00879       |
| 29 | <b>U13C D-glucose (IS)</b>                   | 6.70     | [M-H]- | [13]C6H12O6       | 185.07624     | -              | -              | -              |

Compounds were identified using authentic standards (level 1 of identification); Compounds in bold represent Internal Standards (IS) [ref. 97].

**Supplementary Table S5:** List of the target compounds monitored in the method at pH 3.

| Nº | Compound name                              | Rt (min) | Adduct             | Molecular formula | Precursor ion | Fragment ion 1 | Fragment ion 2 | Fragment ion 3 |
|----|--------------------------------------------|----------|--------------------|-------------------|---------------|----------------|----------------|----------------|
| 1  | L-Tryptophan                               | 6.34     | [M+H] <sup>+</sup> | C11H12N2O2        | 205.09714     | 188.07021      | 146.05972      | 159.09138      |
| 2  | L-Histidine                                | 8.00     | [M+H] <sup>+</sup> | C6H9N3O2          | 156.07674     | 110.07137      | 95.06063       | -              |
| 3  | Uridine                                    | 4.73     | [M-H] <sup>-</sup> | C9H12N2O6         | 243.06225     | 110.02528      | 200.05753      | 152.03604      |
| 4  | Creatine                                   | 6.62     | [M+H] <sup>+</sup> | C4H9N3O2          | 132.07675     | 90.05546       | -              | -              |
| 5  | Glutamic acid                              | 7.10     | [M+H] <sup>+</sup> | C5H9NO4           | 148.06042     | 84.04470       | 102.05511      | 130.04967      |
| 6  | L-Aspartic acid                            | 7.19     | [M+H] <sup>+</sup> | C4H7NO4           | 134.04477     | 74.02417       | 88.03965       | 116.03428      |
| 7  | L-Serine                                   | 7.30     | [M+H] <sup>+</sup> | C3H7NO3           | 106.04986     | 60.04494       | 88.03959       | 70.02920       |
| 8  | L-Alanine                                  | 6.90     | [M+H] <sup>+</sup> | C3H7NO2           | 90.05495      | -              | -              | -              |
| 9  | Creatinine                                 | 6.47     | [M+H] <sup>+</sup> | C4H7N3O           | 114.06619     | 86.07156       | 72.04483       | -              |
| 10 | L-Arginine                                 | 8.00     | [M+H] <sup>+</sup> | C6H14N4O2         | 175.11894     | 70.06556       | 116.07057      | 130.09727      |
| 11 | gamma<br>Aminobutyric acid                 | 6.55     | [M+H] <sup>+</sup> | C4H9NO2           | 104.07061     | 87.04424       | 86.06023       | 69.03388       |
| 12 | L-Methionine                               | 6.42     | [M+H] <sup>+</sup> | C5H11NO2S         | 150.05831     | 104.05294      | 133.03157      | 56.05007       |
| 13 | Ornithine                                  | 8.00     | [M+H] <sup>+</sup> | C5H12N2O2         | 133.09715     | 70.06579       | 116.07086      | 104.96355      |
| 14 | trans-4-Hydroxy-L-<br>proline              | 6.87     | [M+H] <sup>+</sup> | C5H9NO3           | 132.06551     | 86.06033       | 68.04995       | 114.05487      |
| 15 | Valine                                     | 6.47     | [M+H] <sup>+</sup> | C5H11NO2          | 118.08624     | 72.08121       | 55.05482       | -              |
| 16 | L-Threonine                                | 7.08     | [M+H] <sup>+</sup> | C4H9NO3           | 120.06551     | 74.06054       | 56.05013       | 102.05518      |
| 17 | L-Cystine                                  | 8.00     | [M+H] <sup>+</sup> | C6H12N2O4S2       | 241.03111     | 151.98328      | 120.01146      | 195.02599      |
| 18 | Glutamine                                  | 7.30     | [M+H] <sup>+</sup> | C5H10N2O3         | 147.07641     | 130.04968      | 84.04470       | 101.07114      |
| 19 | Glycine                                    | 7.10     | [M+H] <sup>+</sup> | C2H5NO2           | 76.03930      | 58.06564       | -              | -              |
| 20 | L-Asparagine                               | 7.35     | [M+H] <sup>+</sup> | C4H8N2O3          | 133.06076     | 74.02417       | 87.05571       | 116.03421      |
| 21 | Lysine                                     | 8.00     | [M+H] <sup>+</sup> | C6H14N2O2         | 147.11279     | 84.08112       | 130.08611      | -              |
| 22 | Tyrosine                                   | 6.54     | [M+H] <sup>+</sup> | C9H11NO3          | 182.08116     | 136.07547      | 165.05432      | 123.04399      |
| 23 | <b>p-fluoro-DL-<br/>phenylalanine (IS)</b> | 6.10     | [M+H] <sup>+</sup> | C9H10FNO2         | 184.07683     | 138.07109      | 118.06506      | 149.03932      |
| 24 | <b>U13C L-Glutamine<br/>(IS)</b>           | 7.14     | [M+H] <sup>+</sup> | [13]C5H10N2O3     | 152.09319     | 135.06660      | 105.08461      | -              |

Compounds were identified using authentic standards (level 1 of identification); Compounds in bold represent Internal Standards (IS) [ref. 97].

**Supplementary Table S6:** Assigned metabolites with significant differences among groups according to the non-targeted MS-metabolomics in the negative mode.

| m/z      | Rt   | Adduct     | Molecular formula | Error (ppm) | Description                           | CV (%) in QC |
|----------|------|------------|-------------------|-------------|---------------------------------------|--------------|
| 135.0305 | 5.26 | [M-H]-     | C5H4N4O           | 5.39        | Hypoxanthine <sup>#1</sup>            | 23           |
| 117.0187 | 6.84 | [M-H]-     | C4H6O4            | 5.35        | methylmalonic acid <sup>#1</sup>      | 17           |
| 130.0509 | 6.41 | [M-H]-     | C5H9NO3           | 0.25        | 4-Hydroxyproline <sup>#1</sup>        | 26           |
| 177.0409 | 6.76 | [M-H2O-H]- | C6H12O7           | 2.23        | D-Gluconic acid <sup>#2</sup>         | 7            |
| 146.0454 | 6.69 | [M-H]-     | C5H9NO4           | 2.59        | N-acetyl-serine <sup>#2</sup>         | 28           |
| 103.0404 | 6.21 | [M-H]-     | C4H8O3            | 3.19        | beta Hydroxybutyrate <sup>#1</sup>    | 14           |
| 112.0510 | 5.31 | [M-H]-     | C4H7N3O           | 4.73        | Creatinine <sup>#1</sup>              | 14           |
| 104.0348 | 7.33 | [M-H]-     | C3H7NO3           | 3.96        | Serine <sup>#1</sup>                  | 24           |
| 279.2331 | 1.27 | [M-H]-     | C18H32O2          | 0.52        | 9Z,12Z-Linoleic acid <sup>#2</sup>    | 15           |
| 303.2341 | 1.25 | [M-H]-     | C20H32O2          | 3.49        | 8,11-eicosadienoic acid <sup>#2</sup> | 25           |
| 102.0560 | 6.88 | [M-H]-     | C4H9NO2           | 0.46        | 3-Aminobutyric acid <sup>#2</sup>     | 14           |

#n—indicates the metabolite level identification according to the Metabolomics Standards Initiative (MSI) [ref. 97].

**Supplementary Table S7:** Assigned metabolites according to the non-targeted MS-metabolomics in the positive mode.

| m/z      | Rt   | Adduct                 | Molecular formula | Error (ppm) | Description                                                         | CV (%) in QC |
|----------|------|------------------------|-------------------|-------------|---------------------------------------------------------------------|--------------|
| 114.0667 | 5.66 | [M+H] <sup>+</sup>     | C4H7N3O           | 4.21        | Creatinine <sup>#1</sup>                                            | 27           |
| 137.0457 | 4.89 | [M+H] <sup>+</sup>     | C5H4N4O           | 1.02        | Hypoxanthine <sup>#1</sup>                                          | 12           |
| 205.0983 | 6.08 | [M+H] <sup>+</sup>     | C11H12N2O2        | 5.75        | Tryptophan <sup>#1</sup>                                            | 8            |
| 90.0558  | 6.76 | [M+H] <sup>+</sup>     | C3H7NO2           | 8.99        | Alanine <sup>#1</sup>                                               | 10           |
| 156.0774 | 7.87 | [M+H] <sup>+</sup>     | C6H9N3O2          | 4.10        | Histidine <sup>#1</sup>                                             | 4            |
| 205.0974 | 1.44 | [M+H] <sup>+</sup>     | -                 | -           | Indolyl carboxylic acids and derivatives <sup>#3</sup>              | 9            |
| 118.0868 | 5.88 | [M+H] <sup>+</sup>     | C5H11NO2          | 4.66        | Betaine <sup>#2</sup>                                               | 27           |
| 106.0505 | 7.18 | [M+H] <sup>+</sup>     | C3H7NO3           | 6.32        | Serine <sup>#1</sup>                                                | 14           |
| 258.1101 | 7.17 | [M+H] <sup>+</sup>     | C8H20NO6P         | 0.04        | Glycerophosphocholine <sup>#2</sup>                                 | 22           |
| 153.0412 | 5.37 | [M+H] <sup>+</sup>     | C5H4N4O2          | 3.46        | Xanthine <sup>#1</sup>                                              | 6            |
| 120.0657 | 2.97 | [M+H] <sup>+</sup>     | C4H9NO3           | 1.75        | L-Homoserine/2-methylserine/4-Amino-3-hydroxybutyrate <sup>#2</sup> | 14           |
| 203.1513 | 7.58 | [M+H] <sup>+</sup>     | C8H18N4O2         | 4.92        | Asymmetric dimethylarginine <sup>#1</sup>                           | 9            |
| 248.1513 | 5.87 | [M+H] <sup>+</sup>     | C11H21NO5         | 8.22        | 3-Hydroxybutyrylcarnitine <sup>#2</sup>                             | 18           |
| 175.1196 | 7.87 | [M+H] <sup>+</sup>     | C6H14N4O2         | 3.71        | Arginine <sup>#1</sup>                                              | 8            |
| 76.0402  | 6.97 | [M+H] <sup>+</sup>     | C2H5NO2           | 11.18       | Glycine <sup>#1</sup>                                               | 17           |
| 279.2325 | 1.19 | [M+H-H2O] <sup>+</sup> | C18H32O3          | 2.22        | 9(10)-Epoxy-12Z-octadecenoic acid <sup>#2</sup>                     | 6            |
| 205.1560 | 7.76 | [M] <sup>+</sup>       | C9H21N2O3         | 6.29        | 3-Hydroxy-N6,N6,N6-trimethyl-L-lysine <sup>#2</sup>                 | 10           |
| 162.1129 | 6.37 | [M+H] <sup>+</sup>     | C7H15NO3          | 2.78        | Carnitine <sup>#2</sup>                                             | 2            |

#n—indicates the metabolite level identification according to the Metabolomics Standards Initiative (MSI) [ref. 97].





## Supplementary Figure S2

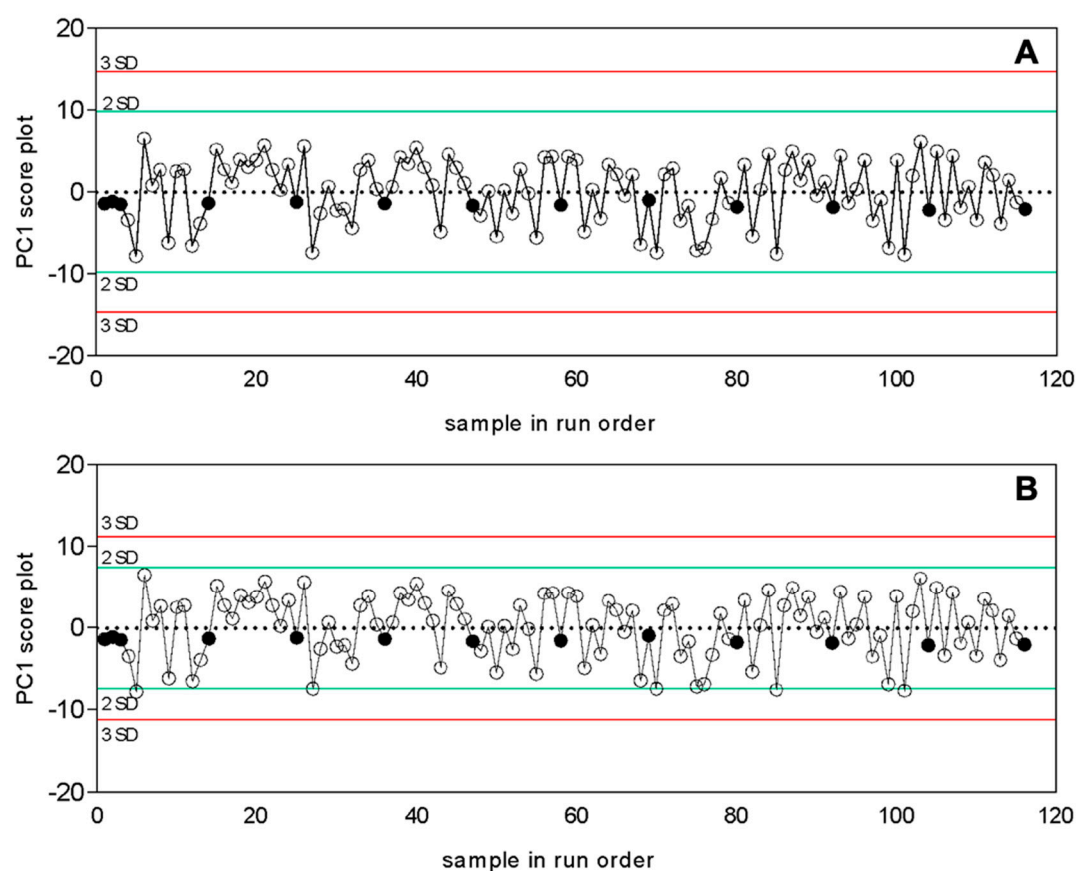

**Supplementary Figure S2.** PC1 scores plot versus sample in run order at (A) pH 8 and (B) pH 3 analyses indicating the stability of the system throughout the analytical run. The black dots represent the QC scores and the white dots represent specimen samples. The figure also illustrates the 2 and 3 standard deviation limits which are shown as solid lines colored in green and red, respectively.

## Supplementary Figure S3

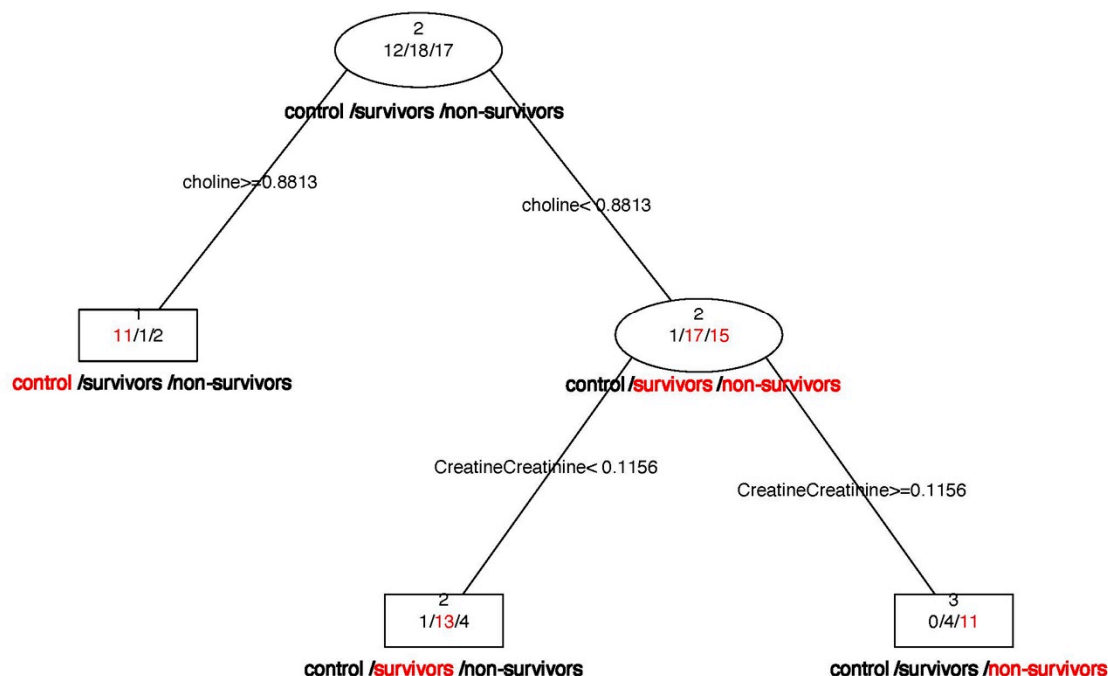

**Supplementary Figure S3.** Classification and Regression Tree (CART) model indicates that  $(\text{CH}_3)_3$ -choline related metabolites and creatine/creatinine present high predictive power in assigning subjects according to their morbidity class.

The CART model was built using the metabolites that were found to be discriminatory in the multivariate PCA analysis, which was based on  $^1\text{H}$  NMR metabolomics:  $(\text{CH}_3)_3$ -choline-related metabolites, creatine/creatinine, glutamine, alanine, histidine, tyrosine, valine, leucine, isoleucine,  $\text{CH}_2$  of lipoproteins (VLDL),  $\text{CH}_3$  of lipoproteins,  $\text{CH}=\text{CH}$  olefinic protons of triacylglycerols, acetoacetate, lactate, acetate, formate, *N*-acetyl of glycoproteins. Sex and age of the subjects were also included in the model. In red is the classification that best predicted the morbidity class for control subjects (partition point choline  $\geq 0.8813$ ), survivors -creatinine/creatinine  $< 0.1156$  and non-survivors -creatinine/creatinine  $\geq 0.1156$ .

## Supplementary Figure S4

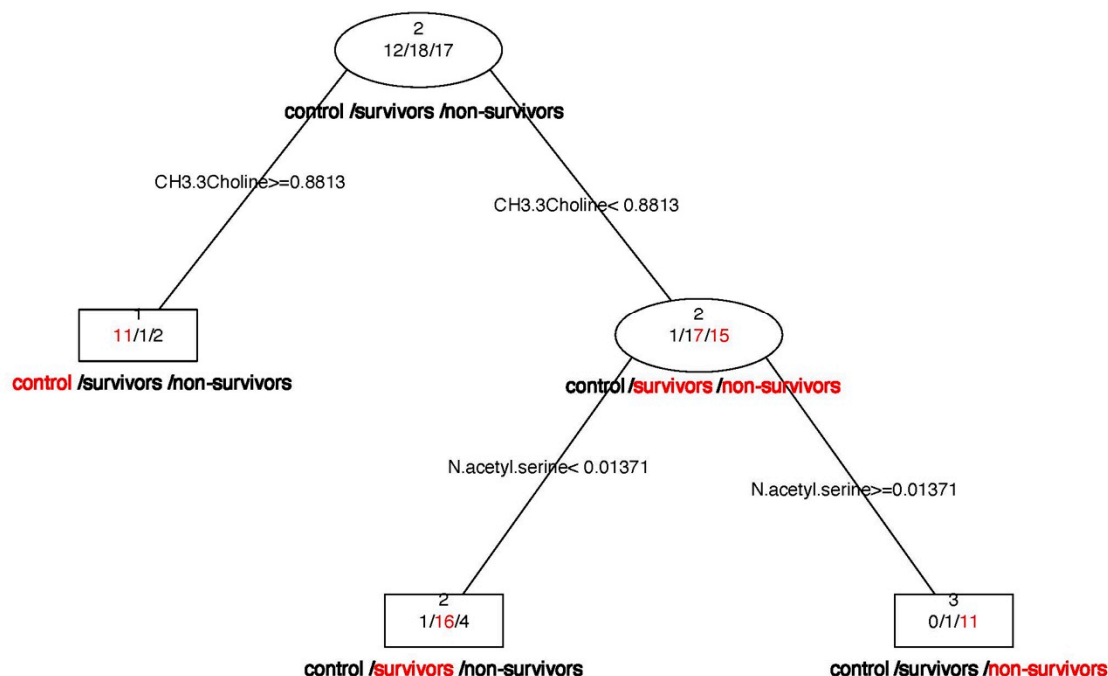

**Supplementary Figure S4.** Classification and Regression Tree (CART) model indicates that CH<sub>3</sub>-choline related metabolites and *N*-acetylserine present high predictive power in assigning subjects to their morbidity class.

The CART model was built using the metabolites that were found to be discriminatory in the NMR and MS- analysis: (CH<sub>3</sub>)<sub>3</sub>-choline-related metabolites, creatine/creatinine, glutamine, alanine, histidine, tyrosine, valine, leucine, isoleucine, serine, betaine, hypoxanthine, xanthine, tryptophan, 4-hydroxyproline, gluconic acid, *N*-acetylserine, asymmetric dimethylarginine, methylmalonic acid, β-hydroxybutyrate, CH<sub>2</sub> of lipoproteins (VLDL), CH<sub>3</sub> of lipoproteins, CH=CH olefinic protons of triacylglycerols, acetoacetate, lactate, acetate, formate, *N*-acetyl of glycoproteins. Sex and age of the subjects were also included in the model. In red is the classification that best predicted the morbidity class for control subjects (partition point choline ≥ 0.8813), survivors - *N*-acetylserine < 0.0137 and non-survivors - *N*-acetylserine ≥ 0.0137.

## Supplementary Figure S5

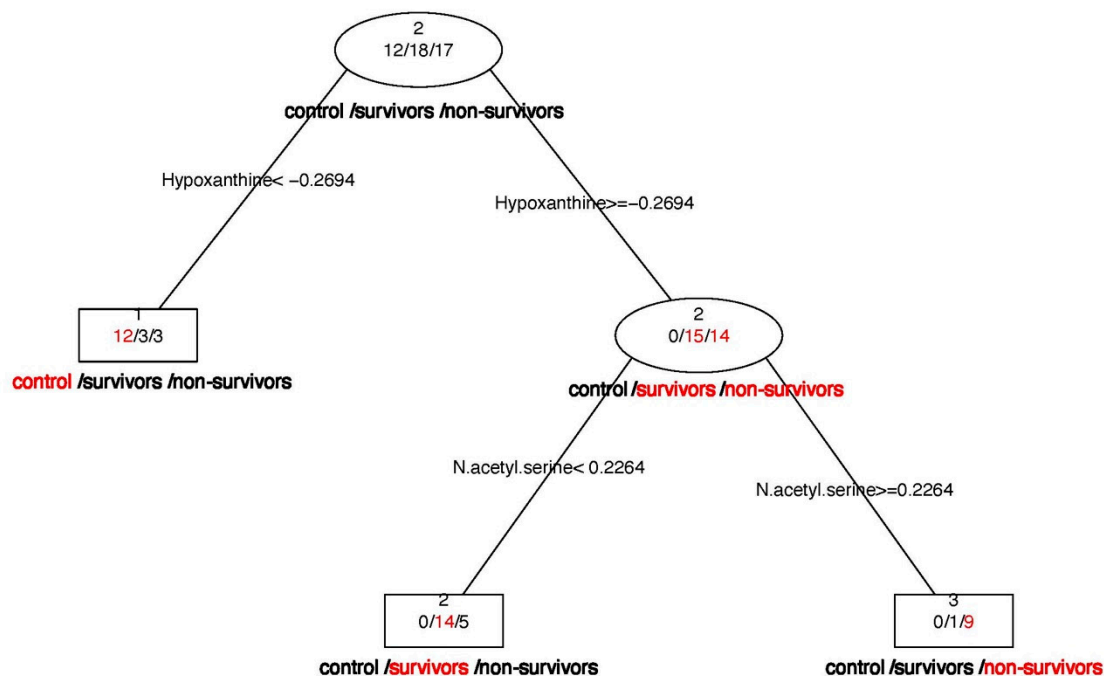

**Supplementary Figure S5.** Classification and Regression Tree (CART) model indicates that hypoxanthine and *N*-acetylserine present high predictive power in assigning subjects to their morbidity class.

The CART model was built using the metabolites that were found to be discriminatory in the MS analysis: glycerophosphocholine, serine, betaine, histidine, alanine, hypoxanthine, xanthine, creatinine, 4-hydroxyproline, gluconic acid, *N*-acetylserine, asymmetric dimethylarginine, methylmalonic acid,  $\beta$ -hydroxybutyrate, tryptophan. Sex and age of the subjects were also included in the model. In red is the classification that best predicted the morbidity class for control subjects (partition point choline < -0.2694), survivors *N*-acetylserine < 0.2264 and non-survivors - *N*-acetylserine  $\geq 0.1156$ .

## Supplementary Figure S6

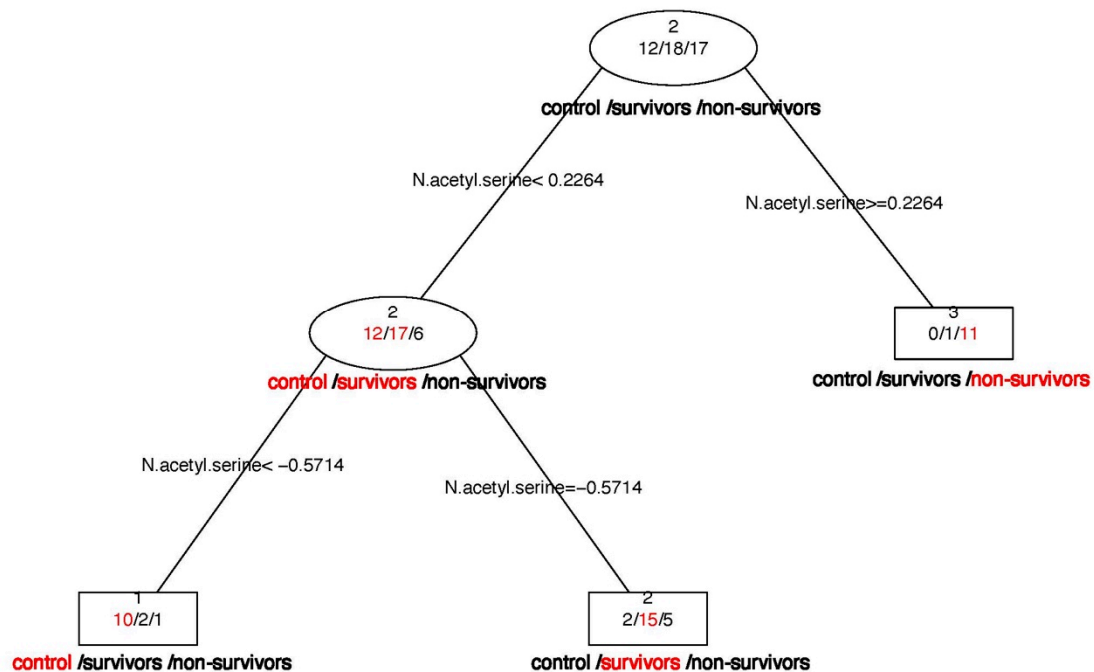

**Supplementary Figure S6.** Classification and Regression Tree (CART) model indicates that N-acetylserine presents high predictive power in assigning subjects to their morbidity class.

The CART model was built using the metabolites that were found to be higher in the non-survivors compared to survivors and control subjects: creatinine, 4-hydroxyproline, gluconic acid and N-acetylserine. Sex and age of the subjects were also included in the model. In red is the classification that best predicted the morbidity class with the partition point  $N\text{-acetylserine} < 0.2264$  for control and survivors subjects and  $\geq 0.2264$  for non-survivors.

## References

1. Sumner, L.W.; Amberg, A.; Barrett, D.; Beale, M.H.; Beger, R.; Daykin, C.A.; Fan, T.W.-M.; Fiehn, O.; Goodacre, R.; Griffin, J.L.; et al. Proposed minimum reporting standards for chemical analysis Chemical Analysis Working Group (CAWG) Metabolomics Standards Initiative (MSI). *Metabolomics* **2007**, *3*, 211–221. <https://doi.org/10.1007/s11306-007-0082-2> [ref. 97]
